# Supplementary material
Source: HighWire-hosted journal article supplement (https://www.cmajopen.ca/highwire/filestream/87915/field_highwire_adjunct_files/3/2021-0095-4-at.pdf)
Supplement: 2021-0095-4-at.pdf [file 2021-0095-4-at.pdf]

A. Second Generation Fluoroquinolones

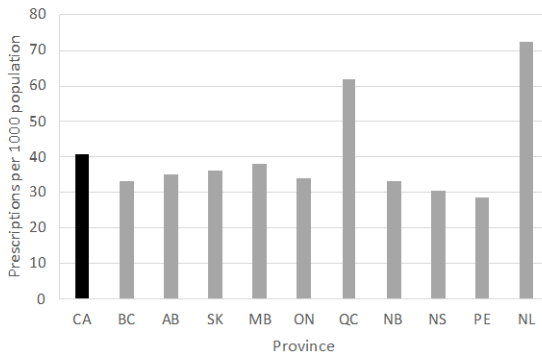

B. Third Generation Fluoroquinolones

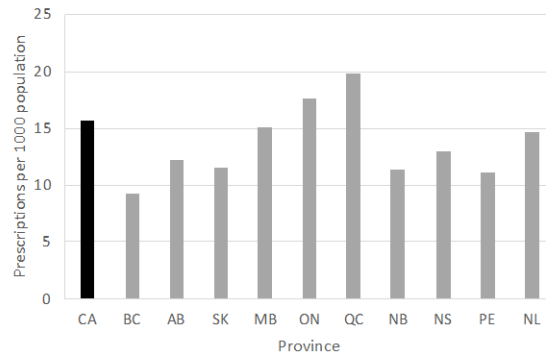

C. Macrolides

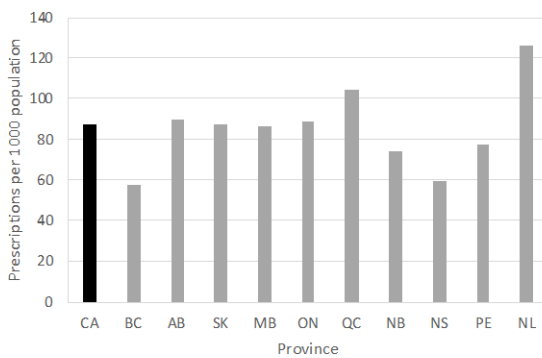

D. Penicillins with beta-lactamase inhibitors

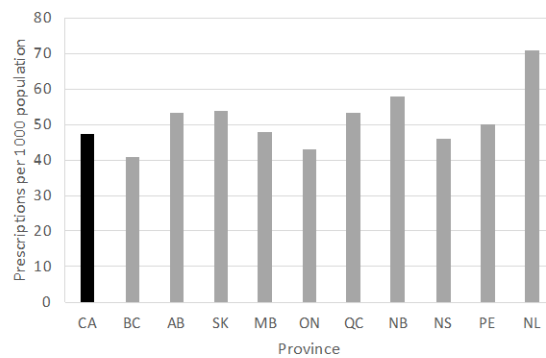

E. Lincosamides

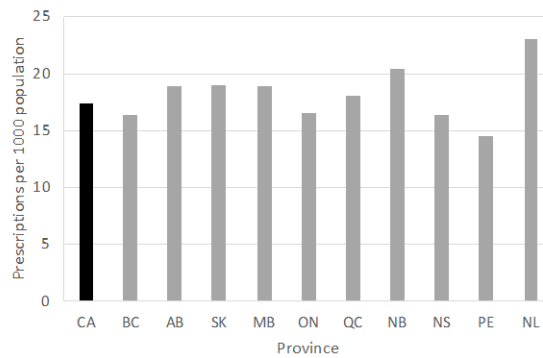

Appendix 4. Rate of outpatient prescription of broad-spectrum oral antibiotics per 1000 population in Canada in 2019, stratified by class and province. CA = Canada; BC = British Columbia; AB = Alberta; SK = Saskatchewan; MB = Manitoba; ON = Ontario; QC = Québec; NB = New Brunswick; NS = Nova Scotia; PE = Prince Edward Island; NL = Newfoundland and Labrador.
